# Supplementary material for: Learning Lessons in the Design and Delivery of Care Home Research
Source: Research Square preprint supplement (doi:10.21203/rs.3.rs-6844598/v1), 2025-07-23
Supplement: Supplementary file 1 [file 25c85c33aed32e03c4d0f32a.docx]

**Focus Group Topic Guide**

Prior to the focus group starting

- Check participants have all read the information sheet and have signed the consent form and are still happy to take part. Answer any questions and re-iterate that involvement is voluntary and that they can change their mind at any point.
- Ensure that all participants are still aware that the focus group will be audio-recorded and that they are still happy with that.

Introduction

Introduce myself and anyone else who may be present (dependent on whether f2f or online)

Ask people to introduce themselves and share what capacity they’re here in

Ask if anyone has hearing or other difficulties that I need to be aware of

Start recording.

Explain to the group

- That everyone’s view is valid and there is no right or wrong answer.
- Discussion needs to be grounded in mutual respect and people should be given the chance to express their views without interruptions and the importance of listening.
- That everything said in the focus group should remain confidential and if they talk to other people about the discussion, people in the group should not be identifiable.
- The audio recording of the discussion will be securely stored at the University of Nottingham and all the participants will be anonymised in any reports or publications that arise from the research.
- Participants are free to withdraw at any time and can leave the discussion at any point.
- The discussion will last between 45 and 60 minutes.
- It is fine to ask questions and take a break if needed.

Topic 1

Have you been involved in research in a care home setting?

If Yes – why did you decide you wanted to get involved?

How was the experience?

If No – what do you think may have prevented your involvement?

Topic 2

Was there anything in particular that made it easier for you to get involved?

- Information provided was easy to read and understand
- Researchers were friendly and approachable
- Managers encouraged involvement (staff)
- Staff encouraged involvement (family/residents)
- Aware that there was research going on?

Topic 3

Was there anything that made it harder for you to get involved or discouraged you from taking part?

- Wasn’t aware that there was research taking place
- Didn’t think research could take place in care homes
- Information provided was difficult to understand/too much information/difficult to read

Topic 4

Do you think that it is important that research is carried out in care homes with residents?

If yes – why

If no - why

In what ways do you think research in care homes might be useful?

We have looked at some of the survey responses that have come in, in some sections there is broad agreement between the respondents but in other sections, there is a divide in opinions.

Over half of respondents rated resident characteristics such as cognitive abilities, frailty, sensory impairments etc as important or very important when it came to running trials in care homes but just over a quarter said it was either unimportant or very unimportant.

What is your view on this?

Why do you think that?

- May want to consider some of the comments such as - there are ways round these barriers, importance of inclusivity and finding ways to get people involved v’s the difficulties with consent.

Again, over half the respondents thought that the geographical location of relatives and whether they were working or not was unimportant or very unimportant and around a third thought it was important or very important.

What is your view on this?

Why do you think that?

Topic 5

What would encourage you as a manager/staff member/resident to get involved in a research project?

- Training/payment/finding out what happens(dissemination events)
- Payment in kind – eg cakes/chocolate
- Time (eg time allowed from other duties if a member of staff)

There were also some differences in opinion regarding the importance of training for care home staff when it comes to running trials in care homes with just over 40% of respondents not sure, 40% of respondents thought it important or very important and around 15% unimportant.

What is your view on this?

Why do you think that?

Most people were in agreement that care home providers and staff should be paid for their involvement in research but not everyone did.

What is your view on this?

Could you expand on that?

What would encourage you as a researcher to undertake research in a care home setting?

- Training
- Mentoring from experienced researchers
- Guidance to help

Is there anything else anyone would like to add about research in care homes generally before we finish?

At the end of the focus group

- Thank all the participants for their contribution.
- Explain what will happen now – transcribing, analysis, writing up the study.
- Ask if they would like to know the findings of the study and say that you would be happy to come back and tell them what we have found and what may happen next.
- Check if anyone has any particular questions or concerns.
- Stop the recording.
