# Supplementary material for: Learning Lessons in the Design and Delivery of Care Home Research
Source: Research Square preprint supplement (doi:10.21203/rs.3.rs-6844598/v1), 2025-07-23
Supplement: Supplementary file 2 [file 933a7aa4994f6000529ce0cb.pdf]

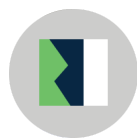

# Learning Lessons in Design and Delivery of Care Home Research: a Modified Delphi Study.

## About this study

Thank you for your interest in this online survey. You have been invited to participate because you took part in our previous survey or attended the Clinical Trials conference and indicated an interest in the study. Please read through this information before agreeing to participate by clicking on the NEXT box below.

This study is being done by Dr Annabelle Long and Dr Caroline Rick researchers from the University of Nottingham. We are investigating the opportunities and challenges of conducting clinical research in care homes. We want to understand these better, so we can enable more care home residents to benefit from the type of research that can only be conducted in this setting. This survey is designed to establish how much people agree with the findings of the study so far.

You will be given some statements to read and then asked to rate how much you agree with each statement. It should take you about 10 minutes to complete with a total of up to 34 questions. No background knowledge is required. This information will then be used to develop some guidelines aimed at sharing learning alongside solutions to challenges from previous research.

# Privacy Notice

## How will your data be used?

Your answers will be completely anonymous and we will use all reasonable endeavours to keep them confidential. Your data will be stored in a password-protected file and all participant's data will be anonymised using a unique study number. Your IP address will not be stored.

Your participation in this study is entirely voluntary. You can withdraw at any point during the questionnaire for any reason, before submitting your answers by clicking the Exit button/closing the browser. The data will only be uploaded on completion of the questionnaire by clicking the SUBMIT button. All questions are optional, and you are free to omit any question.

## Who will have access to your data?

The University of Nottingham is the data controller for the purposes of the Data Protection. Your data may be shared with study staff and investigators and any relevant regulatory authorities.

We believe there are no known risks associated with this research study; however, as with any online related activity the risk of a breach is always possible. We will do everything possible to ensure your answers in this study will remain anonymous. We will minimize any risks by storing all data on a secure dedicated web server. Access will be restricted by user identifiers and passwords (encrypted using a one-way encryption method)

The results of the study may be published in scientific journals and presented at scientific conferences. The data will be reported anonymously, with any identifying information removed.

If you have any questions about this project, please do not hesitate to contact the Lead Researcher Dr Annabelle Long at [annabelle.long@nottingham.ac.uk](mailto:annabelle.long@nottingham.ac.uk) or if you have any concerns about any aspect of this study please contact Dr Caroline Rick at [caroline.rick@nottingham.ac.uk](mailto:caroline.rick@nottingham.ac.uk) or Mr Garry Meakin at [garry.meakin@nottingham.ac.uk](mailto:garry.meakin@nottingham.ac.uk). If you remain unhappy and wish to complain formally, you should then contact the FMHS Research Ethics Committee Administrator, c/o The University of Nottingham, Faculty PVC Office, E41, Medical School, Queen's Medical Centre Campus, Nottingham University Hospitals, Nottingham, NG7 2UH. E-mail: [FMHS-ResearchEthics@nottingham.ac.uk](mailto:FMHS-ResearchEthics@nottingham.ac.uk).

This study has been reviewed and given a favourable opinion by the University of Nottingham, Faculty of Medicine & Health Sciences Research Ethics Committee (FMHS 124-0224)

By continuing, you acknowledge that you have read and understood the information and agree to participate in this survey.

Thank you very much for your participation in this research project. If you are happy to proceed with the survey, please press NEXT.

## Need for Research in Care Homes

Please indicate the extent to which you agree or disagree with each of the following statements

1. Research is important in care homes as they are different to hospitals.

|             | Strongly Agree        | Agree                 | Neither agree or disagree | Disagree              | Strongly disagree     |
|-------------|-----------------------|-----------------------|---------------------------|-----------------------|-----------------------|
| Statement 1 | <input type="radio"/> | <input type="radio"/> | <input type="radio"/>     | <input type="radio"/> | <input type="radio"/> |

2. Research is important in care homes as without it, opportunities to improve care and move practice forward would be missed.

|             | Strongly Agree        | Agree                 | Neither agree or disagree | Disagree              | Strongly disagree     |
|-------------|-----------------------|-----------------------|---------------------------|-----------------------|-----------------------|
| Statement 2 | <input type="radio"/> | <input type="radio"/> | <input type="radio"/>     | <input type="radio"/> | <input type="radio"/> |

3. Research has wider benefits for residents and care home staff, which need to be clearly articulated and understood.

|             | Strongly agree        | Agree                 | Neither agree or disagree | Disagree              | Strongly disagree     |
|-------------|-----------------------|-----------------------|---------------------------|-----------------------|-----------------------|
| Statement 3 | <input type="radio"/> | <input type="radio"/> | <input type="radio"/>     | <input type="radio"/> | <input type="radio"/> |

4. The governance of research in care home settings is complex and discourages participation.

|             | Strongly agree        | Agree                 | Neither agree or disagree | Disagree              | Strongly disagree     |
|-------------|-----------------------|-----------------------|---------------------------|-----------------------|-----------------------|
| Statement 4 | <input type="radio"/> | <input type="radio"/> | <input type="radio"/>     | <input type="radio"/> | <input type="radio"/> |

5. If you have any additional comments or questions about these statements please write them below.

## Facilitators to Research Involvement

Please indicate the extent to which you agree or disagree with each of the following statements

6. For research to be successful in a care home environment there needs to be buy-in from the whole care team.

|             | Strongly agree        | Agree                 | Neither agree or disagree | Disagree              | Strongly disagree     |
|-------------|-----------------------|-----------------------|---------------------------|-----------------------|-----------------------|
| Statement 6 | <input type="radio"/> | <input type="radio"/> | <input type="radio"/>     | <input type="radio"/> | <input type="radio"/> |

7. Receptive management is key to a care home being involved in research.

|             | Strongly agree        | Agree                 | Neither agree or disagree | Disagree              | Strongly disagree     |
|-------------|-----------------------|-----------------------|---------------------------|-----------------------|-----------------------|
| Statement 7 | <input type="radio"/> | <input type="radio"/> | <input type="radio"/>     | <input type="radio"/> | <input type="radio"/> |

8. Face-to-face contact is important to facilitate care home involvement in research.

|             | Strongly agree        | Agree                 | Neither agree or disagree | Disagree              | Strongly disagree     |
|-------------|-----------------------|-----------------------|---------------------------|-----------------------|-----------------------|
| Statement 8 | <input type="radio"/> | <input type="radio"/> | <input type="radio"/>     | <input type="radio"/> | <input type="radio"/> |

9. It is important to provide training to give care home staff and understanding of general research principles.

|             | Strongly agree        | Agree                 | Neither agree or disagree | Disagree              | Strongly disagree     |
|-------------|-----------------------|-----------------------|---------------------------|-----------------------|-----------------------|
| Statement 9 | <input type="radio"/> | <input type="radio"/> | <input type="radio"/>     | <input type="radio"/> | <input type="radio"/> |

10. Training needs to be specific to each trial and undertaken only as necessary.

|              | Strongly agree        | Agree                 | Neither agree or disagree | Disagree              | Strongly disagree     |
|--------------|-----------------------|-----------------------|---------------------------|-----------------------|-----------------------|
| Statement 10 | <input type="radio"/> | <input type="radio"/> | <input type="radio"/>     | <input type="radio"/> | <input type="radio"/> |

11. Research offers care home staff an opportunity to develop and learn new knowledge and skills.

|              | Strongly agree        | Agree                 | Neither agree or disagree | Disagree              | Strongly disagree     |
|--------------|-----------------------|-----------------------|---------------------------|-----------------------|-----------------------|
| Statement 11 | <input type="radio"/> | <input type="radio"/> | <input type="radio"/>     | <input type="radio"/> | <input type="radio"/> |

12. It is important to pay care home staff for the time and effort of their involvement.

|              | Strongly agree        | Agree                 | Neither agree or disagree | Disagree              | Strongly disagree     |
|--------------|-----------------------|-----------------------|---------------------------|-----------------------|-----------------------|
| Statement 12 | <input type="radio"/> | <input type="radio"/> | <input type="radio"/>     | <input type="radio"/> | <input type="radio"/> |

13. Paying a care home chain to be involved in research is appropriate to ensure involvement.

|              | Strongly agree        | Agree                 | Neither agree or disagree | Disagree              | Strongly Disagree     |
|--------------|-----------------------|-----------------------|---------------------------|-----------------------|-----------------------|
| Statement 13 | <input type="radio"/> | <input type="radio"/> | <input type="radio"/>     | <input type="radio"/> | <input type="radio"/> |

14. If you have any additional comments or questions about these statements please write them below.



## Inclusion in Research

Please indicate the extent to which you agree or disagree with each of the following statements

15. All care home residents need to be involved in research where possible to ensure the research is meaningful for the target population.

|              | Strongly agree        | Agree                 | Neither agree or disagree | Disagree              | Strongly disagree     |
|--------------|-----------------------|-----------------------|---------------------------|-----------------------|-----------------------|
| Statement 15 | <input type="radio"/> | <input type="radio"/> | <input type="radio"/>     | <input type="radio"/> | <input type="radio"/> |

16. There needs to be defined processes to ensure all care home residents can be involved in research.

|              | Strongly agree        | Agree                 | Neither agree nor disagree | Disagree              | Strongly disagree     |
|--------------|-----------------------|-----------------------|----------------------------|-----------------------|-----------------------|
| Statement 16 | <input type="radio"/> | <input type="radio"/> | <input type="radio"/>      | <input type="radio"/> | <input type="radio"/> |

17. Research protocols need to ensure that sufficient time is allowed to recruit using multiple methods and allow access to information in a variety of ways.

|              | Strongly agree        | Agree                 | Neither agree or disagree | Disagree              | Strongly disagree     |
|--------------|-----------------------|-----------------------|---------------------------|-----------------------|-----------------------|
| Statement 17 | <input type="radio"/> | <input type="radio"/> | <input type="radio"/>     | <input type="radio"/> | <input type="radio"/> |

18. Researchers need to think creatively about how to involve care home residents in research.

|              | Strongly agree        | Agree                 | Neither agree or disagree | Disagree              | Strongly disagree     |
|--------------|-----------------------|-----------------------|---------------------------|-----------------------|-----------------------|
| Statement 18 | <input type="radio"/> | <input type="radio"/> | <input type="radio"/>     | <input type="radio"/> | <input type="radio"/> |

19. If you have any additional comments or questions about these statements please write them below.

## Potential Solutions

Please indicate the extent to which you agree or disagree with each of the following statements

20. For research to be successful researchers need to be flexible, fit in with the routines of the home and recognise the value of the care home staff.

|              | Strongly agree        | Agree                 | Neither agree or disagree | Disagree              | Strongly disagree     |
|--------------|-----------------------|-----------------------|---------------------------|-----------------------|-----------------------|
| Statement 20 | <input type="radio"/> | <input type="radio"/> | <input type="radio"/>     | <input type="radio"/> | <input type="radio"/> |

21. There needs to be more collaboration between care homes and other research agencies (such as universities) to develop and maintain good working relationships.

|              | Strongly agree        | Agree                 | Neither agree or disagree | Disagree              | Strongly disagree     |
|--------------|-----------------------|-----------------------|---------------------------|-----------------------|-----------------------|
| Statement 21 | <input type="radio"/> | <input type="radio"/> | <input type="radio"/>     | <input type="radio"/> | <input type="radio"/> |

22. There needs to be defined principles on payment for care home research to ensure equity with equivalent research taking place in the NHS.

|              | Strongly agree        | Agree                 | Neither agree or disagree | Disagree              | Strongly disagree     |
|--------------|-----------------------|-----------------------|---------------------------|-----------------------|-----------------------|
| Statement 22 | <input type="radio"/> | <input type="radio"/> | <input type="radio"/>     | <input type="radio"/> | <input type="radio"/> |

23. It is important to embed research into all care home activities including induction, training and staff meetings for staff to appreciate the importance and benefit of research.

|              | Strongly agree        | Agree                 | Neither agree or disagree | Disagree              | Strongly disagree     |
|--------------|-----------------------|-----------------------|---------------------------|-----------------------|-----------------------|
| Statement 23 | <input type="radio"/> | <input type="radio"/> | <input type="radio"/>     | <input type="radio"/> | <input type="radio"/> |

24. Time is needed to develop good relationships between staff and researchers, and this should be part of any funding application which involves research in care homes.

|              | Strongly agree        | Agree                 | Neither agree or disagree | Disagree              | Strongly disagree     |
|--------------|-----------------------|-----------------------|---------------------------|-----------------------|-----------------------|
| Statement 24 | <input type="radio"/> | <input type="radio"/> | <input type="radio"/>     | <input type="radio"/> | <input type="radio"/> |

25. Researchers need to improve the implementation of research into practice to aid staff and residents' understanding of its importance.

|              | Strongly agree        | Agree                 | Neither agree or disagree | Disagree              | Strongly disagree     |
|--------------|-----------------------|-----------------------|---------------------------|-----------------------|-----------------------|
| Statement 25 | <input type="radio"/> | <input type="radio"/> | <input type="radio"/>     | <input type="radio"/> | <input type="radio"/> |

26. Researchers need to make better use of available technology to improve the research process in care homes.

|              | Strongly agree        | Agree                 | Neither agree or disagree | Disagree              | Strongly disagree     |
|--------------|-----------------------|-----------------------|---------------------------|-----------------------|-----------------------|
| Statement 26 | <input type="radio"/> | <input type="radio"/> | <input type="radio"/>     | <input type="radio"/> | <input type="radio"/> |

27. Developing ideas in collaboration with care home staff and residents would ensure that the research undertaken is important and relevant to those people involved.

|              | Strongly Agree        | Agree                 | Neither agree or disagree | Disagree              | Strongly Disagree     |
|--------------|-----------------------|-----------------------|---------------------------|-----------------------|-----------------------|
| Statement 27 | <input type="radio"/> | <input type="radio"/> | <input type="radio"/>     | <input type="radio"/> | <input type="radio"/> |

28. If you have any additional comments or questions about these statements please write them below

## About you

Your information is highly confidential, the following information is for internal research purposes only and information will not be shared externally.

29. What is your name?

30. Are you.....

- ☐ Care home owner
- ☐ Care home staff member
- ☐ Care home resident
- ☐ Family member of a care home resident
- ☐ Manager/Director of a care home chair
- ☐ Manager of a single care home
- ☐ Academic/Clinical academic researcher
- ☐ Other

31. How old are you?

- ☐ 18 - 25
- ☐ 26 - 40
- ☐ 41 - 55
- ☐ 56 - 70
- ☐ 71 - 85
- ☐ 85+
- ☐ Prefer not to say

32. What is your gender?

- ☐ Female
- ☐ Male
- ☐ Prefer to describe in another way
- ☐ Prefer not to say

33. We are inviting participants to take part in the next round of this study. If you would be interested in continuing with this study please provide your email address below. Thank you.

34. Would you like to be entered into the prize draw to win a £30 voucher

☐ Yes

☐ No

35. If Yes please leave your contact details below

---

This content is neither created nor endorsed by Microsoft. The data you submit will be sent to the form owner.

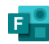

Microsoft Forms
